# Supplementary material
Source: Springer Nature journal article supplement (https://www.springermedizin.de/resource/supplementary/12990_2008_130_MOESM5_ESM.pdf/9612628)
Supplement: MOESM5 [file 9612628]

# The Blurry Picture

*Sensation*

*Cell  
body*

*Receptor  
Type*

*Stimuli*

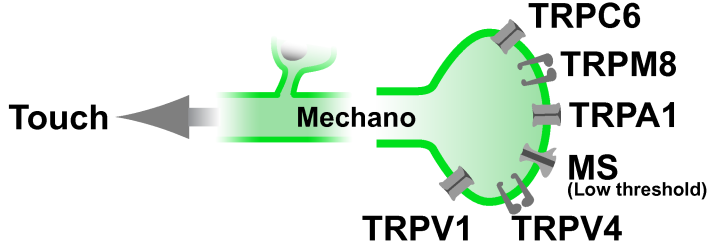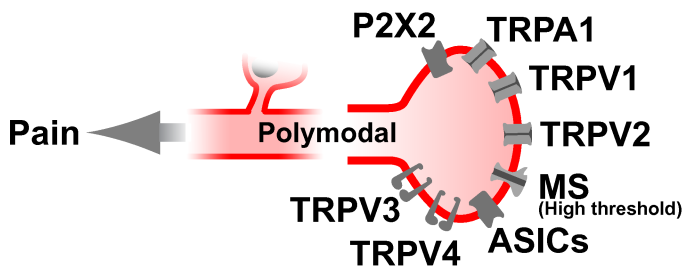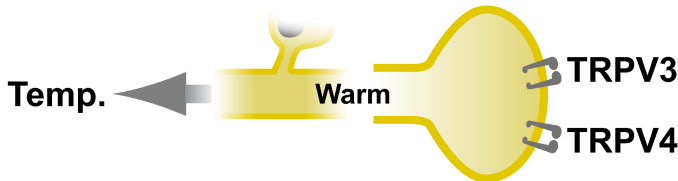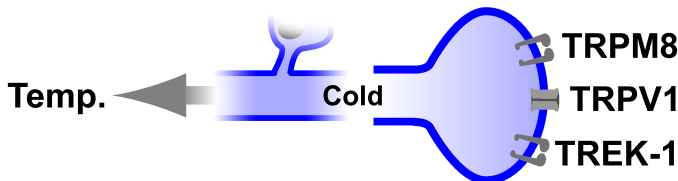

Innocuous  
mechanical  
forces

Noxious  
stimuli

( Strong mechanical  
forces, H<sup>+</sup>, K<sup>+</sup>,  
Endogenous &  
Exogenous Chemicals,  
Noxious Heat & Cold )

Moderate  
temperature  
changes

( Warming & Cooling )
